# Supplementary material for: A Self-Disperse Copper-Based Catalyst Synthesized via a Dry Mixing Method for Acetylene Hydrochlorination
Source: MDPI journal article supplement (doi:10.3390/catal14030207), 2024-03-20
Supplement: s1 [file s1]

Archive with 1 entries (1 files):
- catalysts-2785783-SI.pdf
